# Supplementary material for: A microbial signature for Crohn's disease
Source: PubMed Central journal article supplement — Gut. 2017 Feb 7;66(5):813–22. doi: 10.1136/gutjnl-2016-313235 (PMC5531220; doi:10.1136/gutjnl-2016-313235), 2017-02-07
Supplement: gutjnl-2016-313235supp003.pdf [file gutjnl-2016-313235supp003.pdf]

## ASSOCIATION BETWEEN METADATA AND RELATIVE ABUNDANCE OF GROUPS OF MICROBES

| SMOKING HABIT - UC and CD                                                                           | UC       |             | CD        |               |
|-----------------------------------------------------------------------------------------------------|----------|-------------|-----------|---------------|
|                                                                                                     | SMOKERS  | NON-SMOKERS | SMOKERS-2 | NON-SMOKERS-2 |
| p__Firmicutes;c__Clostridia;o__Clostridiales;f__Peptostreptococcaceae;g__                           | 0.000000 | 0.000081    | 0.000275  | 0.000009      |
| p__Bacteroidetes;c__Bacteroidia;o__Bacteroidales;f__Prevotellaceae;g__Prevotella                    | 0.133849 | 0.046244    | 0.000403  | 0.020871      |
| p__Bacteroidetes;c__Bacteroidia;o__Bacteroidales;f__[Odoribacteraceae];g__Butyricimonas             | 0.000126 | 0.000242    | 0.000037  | 0.000079      |
| p__Actinoc__Coriobacteridae;o__Coriobacterineae;f__Coriobacteriaceae;g__Eggerthella;s__lenta        | 0.000202 | 0.000073    | 0.000018  | 0.000070      |
| p__Actinoc__Actinobacteridae;o__Bifidobacteriales;f__Bifidobacteriaceae;g__Bifidobacterium;s__adole | 0.002345 | 0.036023    | 0.001375  | 0.005323      |
| p__Firmicutes;c__Clostridia;o__Clostridiales;f__Clostridiaceae                                      | 0.001361 | 0.007342    | 0.032509  | 0.002131      |
| p__Firmicutes;c__Clostridia;o__Clostridiales;f__Veillonellaceae                                     | 0.009328 | 0.004139    | 0.000843  | 0.002920      |

| SITE OF DISEASE - CD                                                                       | L1        | L3        |
|--------------------------------------------------------------------------------------------|-----------|-----------|
| p__Firmicutes;c__Erysipelotrichia;o__Erysipelotrichales;f__Erysipelotrichaceae;g__         | 8.633E-03 | 2.244E-02 |
| p__Firmicutes;c__Bacilli;o__Lactobacillales;f__Enterococcaceae;g__Enterococcus;s__faecalis | 2.017E-04 | 4.034E-05 |

| SITE OF DISEASE - UC                                                          | E1      | E2      | E3      |
|-------------------------------------------------------------------------------|---------|---------|---------|
| p__Firmicutes;c__Clostridia;o__Clostridiales;f__[Mogibacteriaceae]            | 0.00235 | 0.00114 | 0.00071 |
| p__Firmicutes;c__Clostridia;o__Clostridiales;f__                              | 0.06815 | 0.05187 | 0.02447 |
| p__Firmicutes;c__Clostridia;o__Clostridiales;f__Clostridiaceae;g__Clostridium | 0.00903 | 0.00051 | 0.00062 |
| p__Firmicutes;c__Clostridia;o__Clostridiales;f__Peptostreptococcaceae;g__     | 0.00020 | 0.00000 | 0.00002 |
